# Supplementary material for: Exotic carbon nanostructures obtained through controllable defect engineering
Source: Royal Society of Chemistry journal article supplement (doi:10.1039/c5ra04831a), 2015-01-01
Supplement: c5ra04831a7.pdf [file c5ra04831a7.pdf]

## Supplemental information

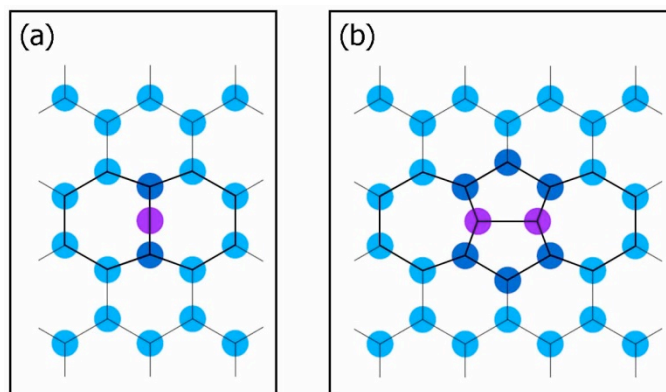

**Figure S1.** Schematic representation of **(a)** *type-A* defects (carbon adatoms) and **(b)** *type-B* defect (inverse Stone-Wales defect).

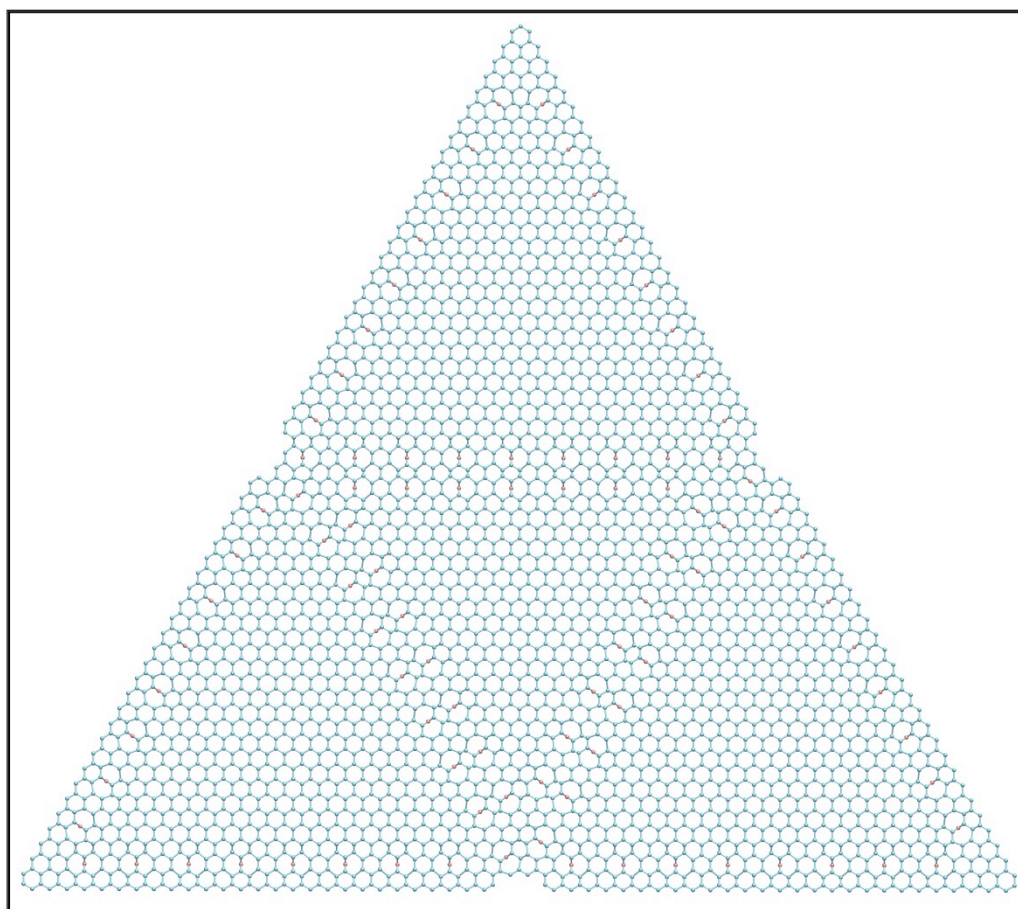

**Figure S2.** The initial configuration of a triangular GNR with *type-A* defects (carbon adatoms). In a time span of 29 ps the GNR transforms into a nano-tetrahedral.
